# Supplementary material for: Checkpoint Defects Elicit a WRNIP1-Mediated Response to Counteract R-Loop-Associated Genomic Instability
Source: MDPI journal article supplement (doi:10.3390/cancers12020389), 2020-02-07

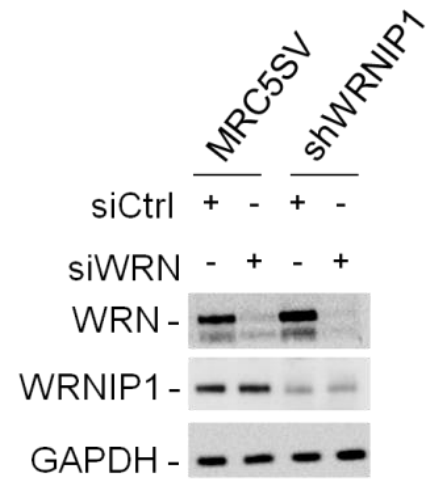

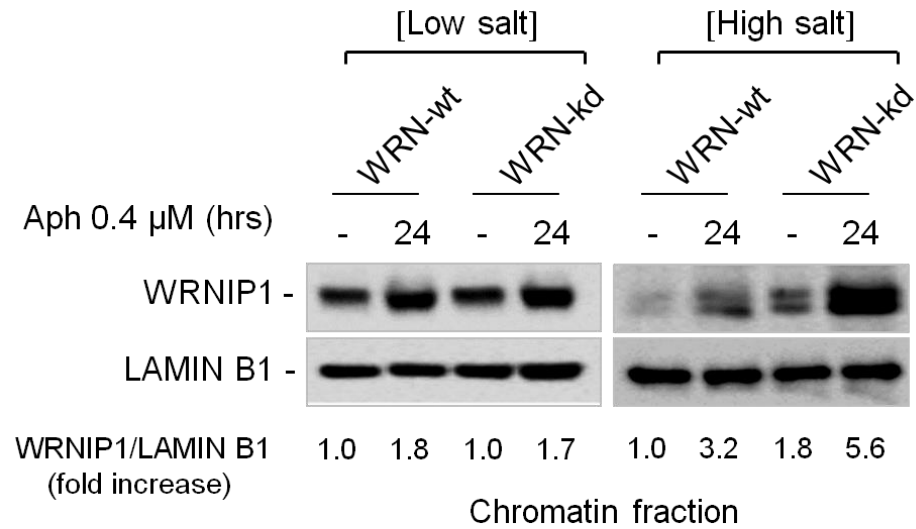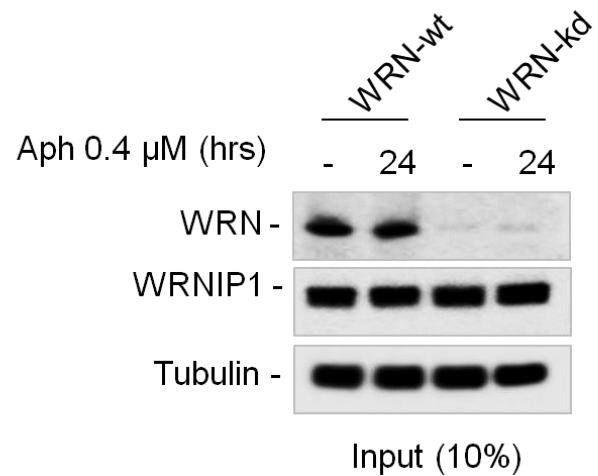

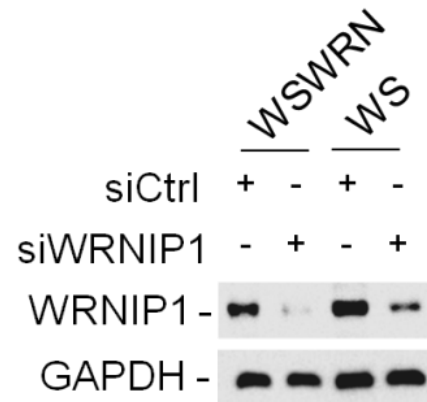

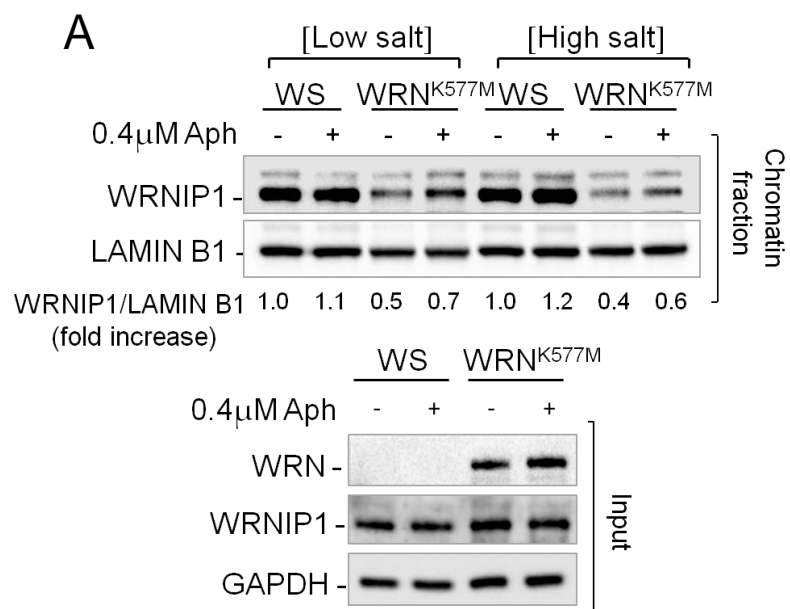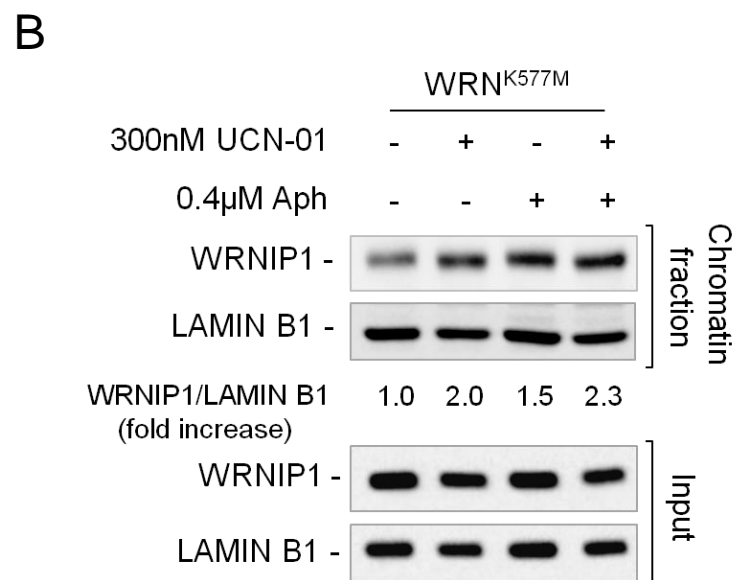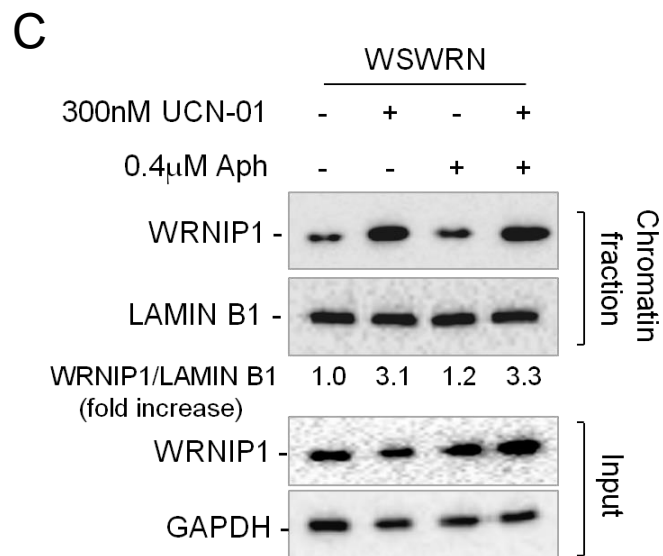

Suppl. Figure 4

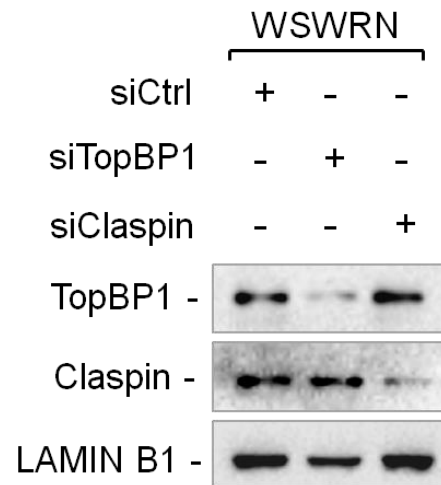

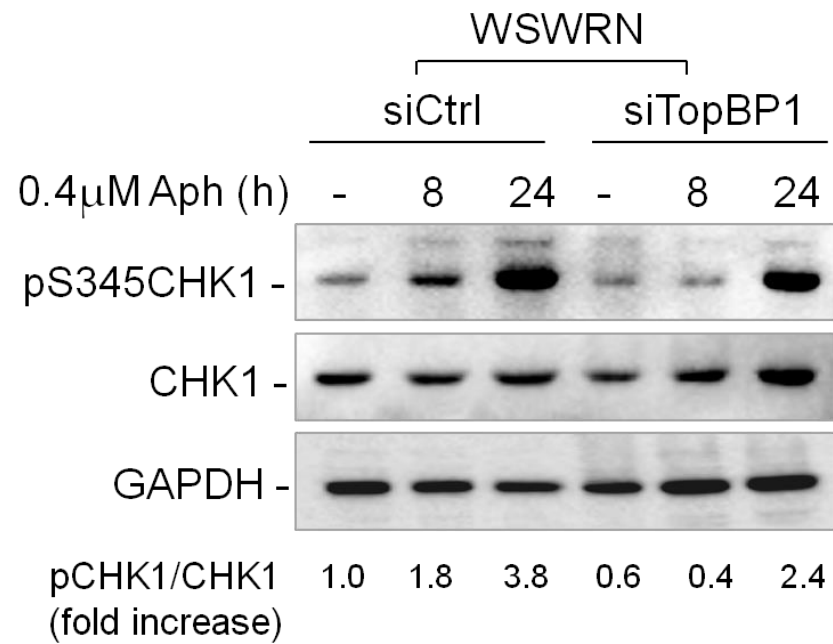

Suppl. Figure 6

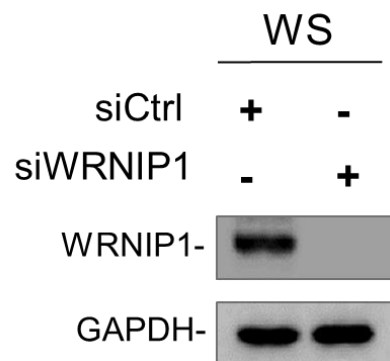

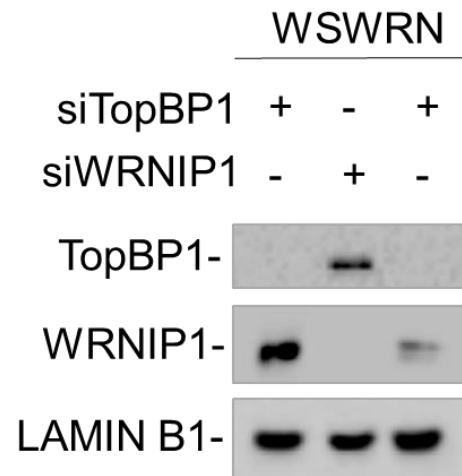



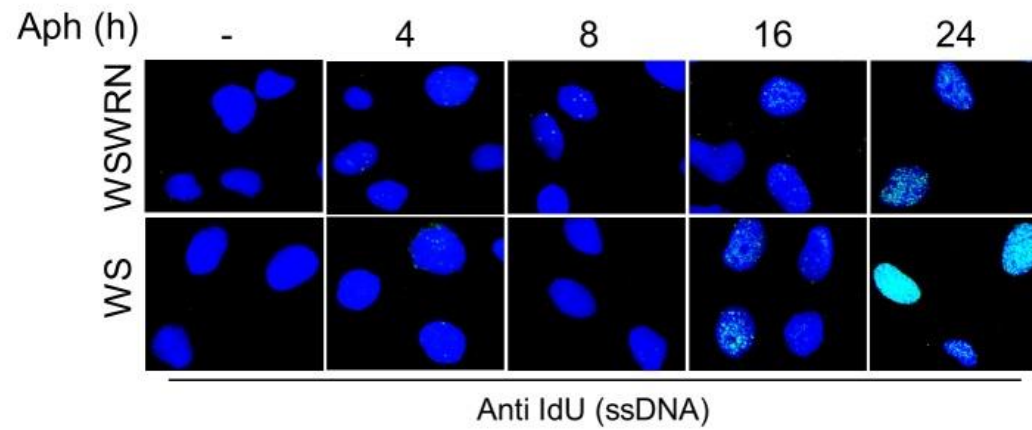

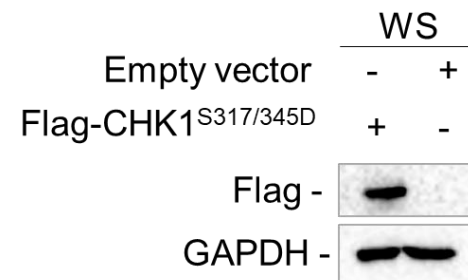

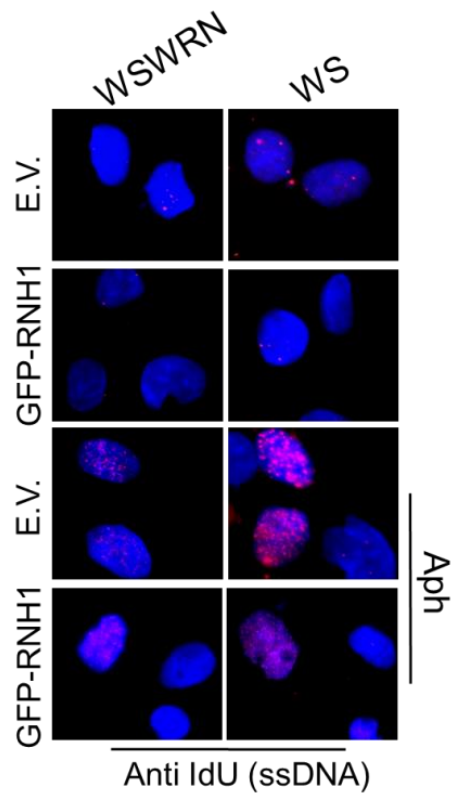

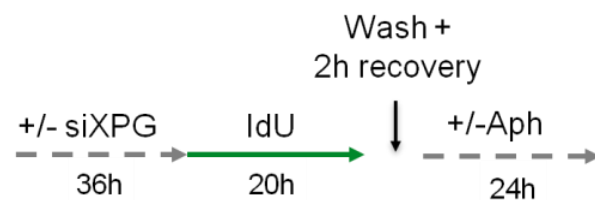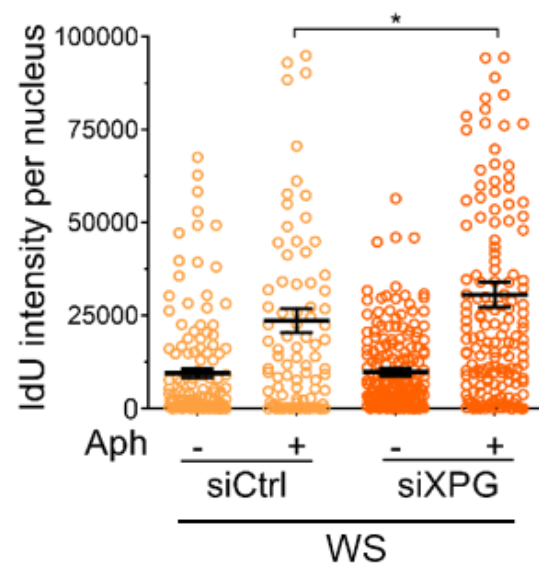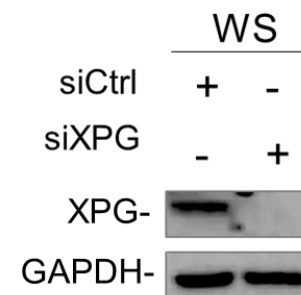

Suppl. Figure 12

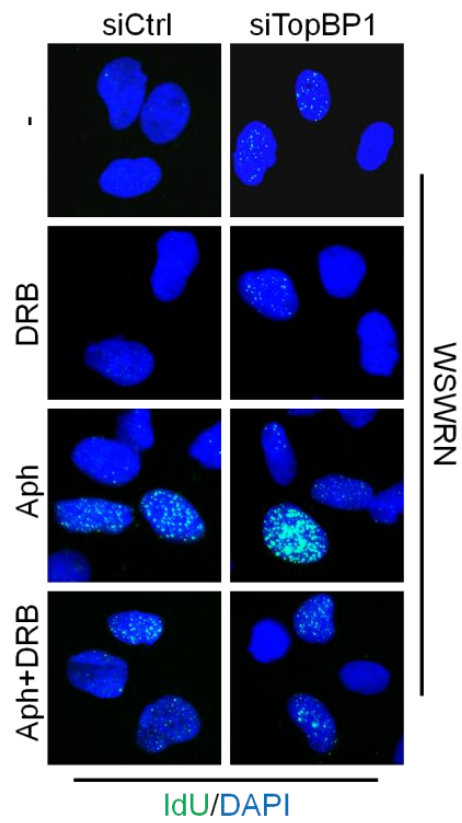

Figure 1

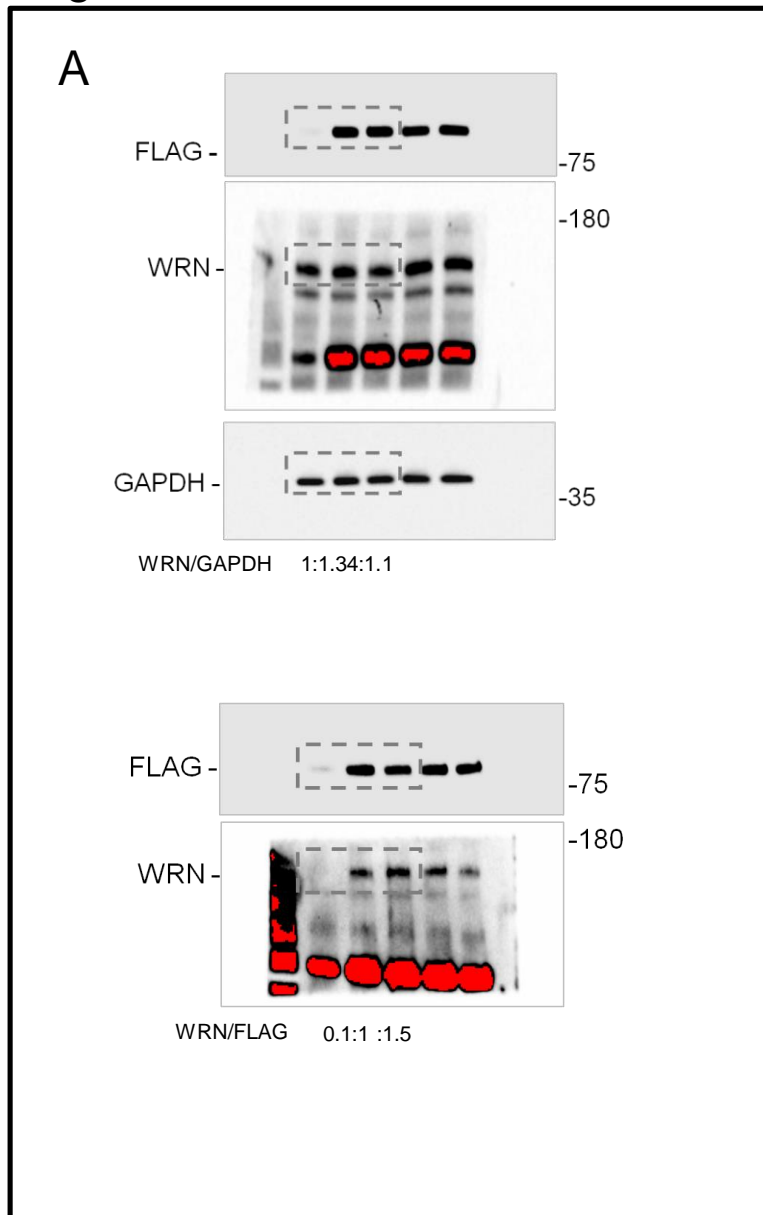

Suppl. Figure 1

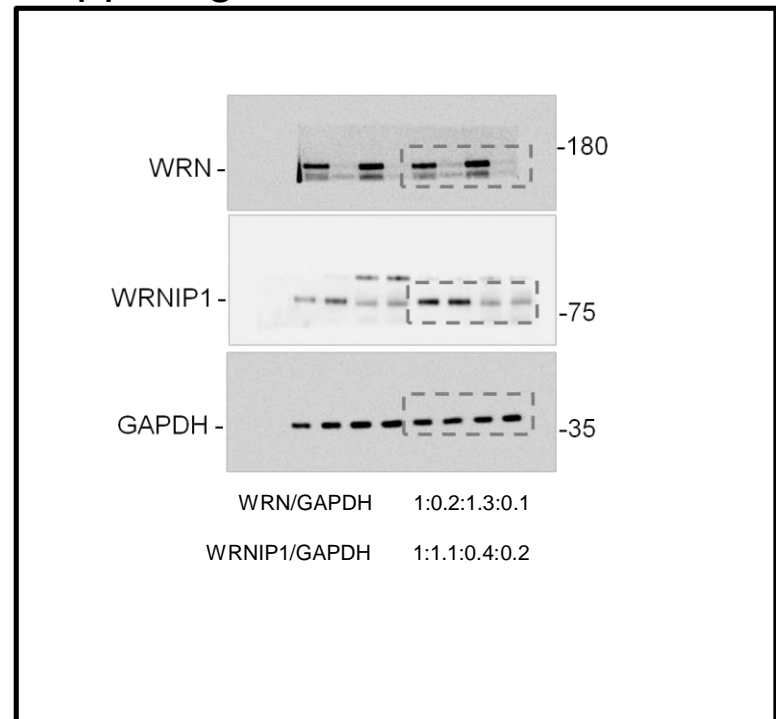

**Figure 2**

**B**

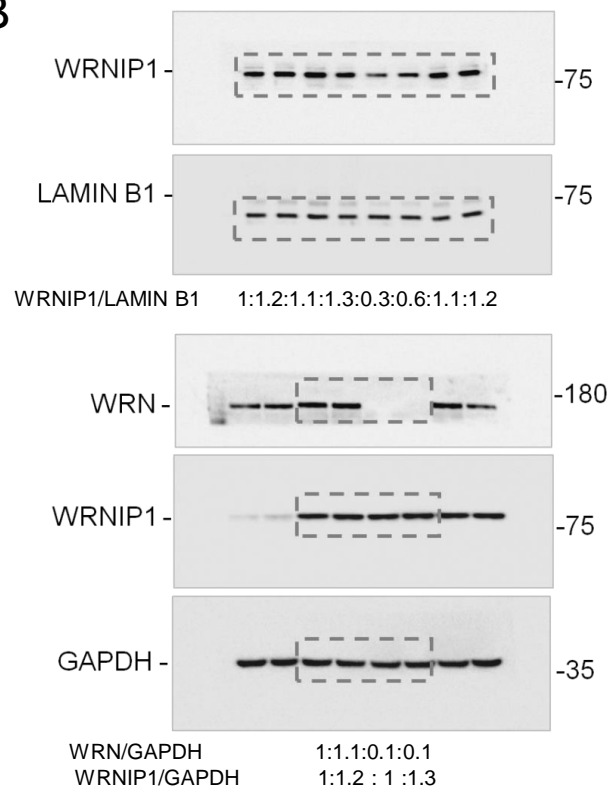

**D**

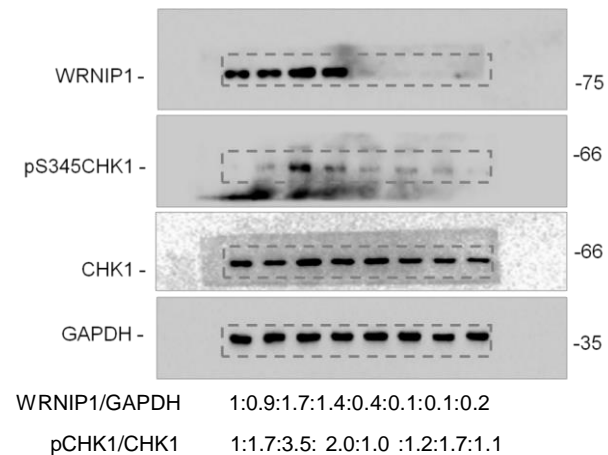

**E**

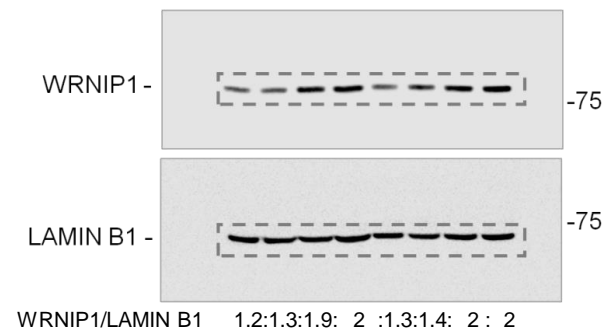

**Suppl. Figure 3**

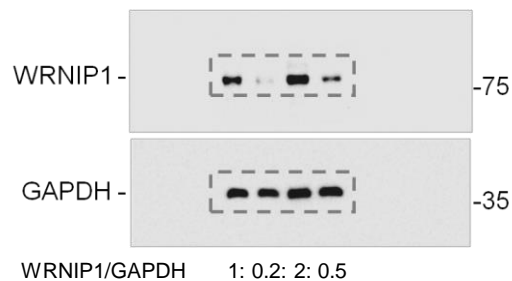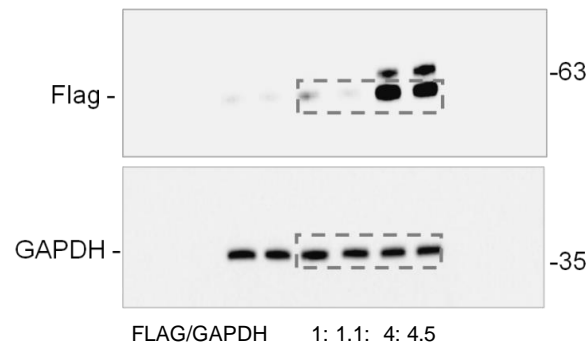

Figure 3

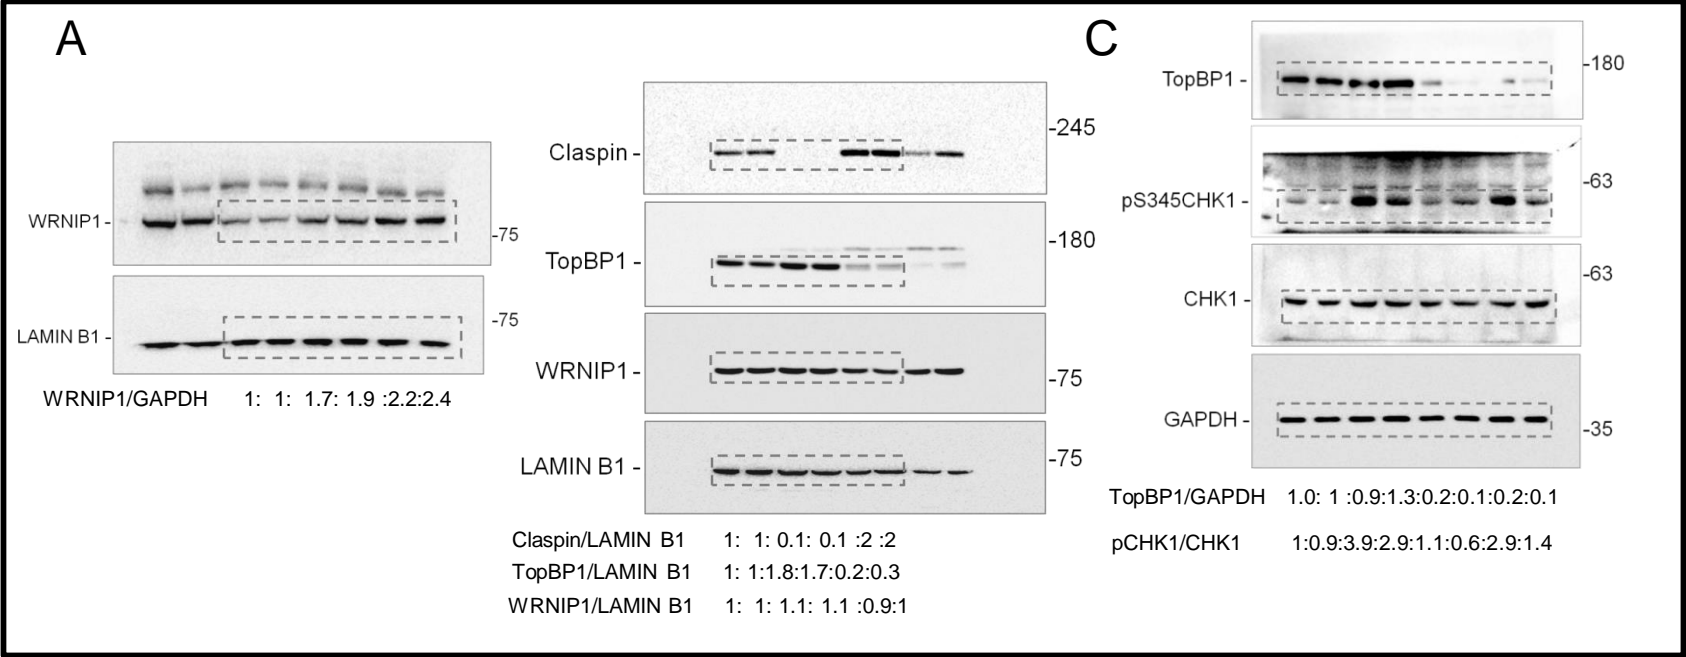

Suppl. Figure 5

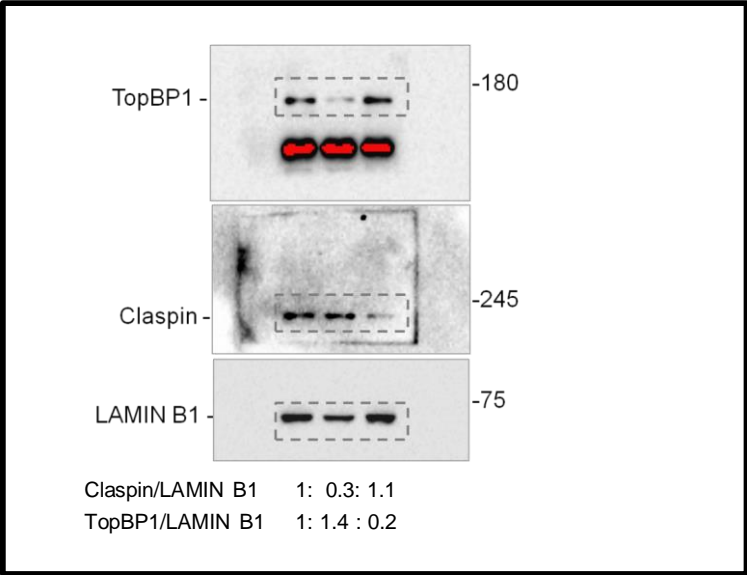



Suppl. Figure 7

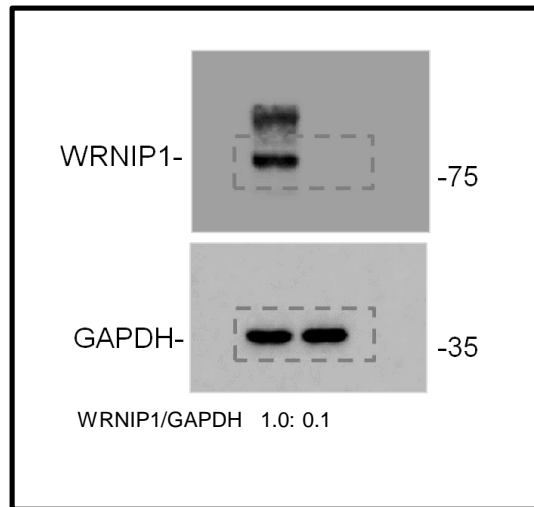

Suppl. Figure 8

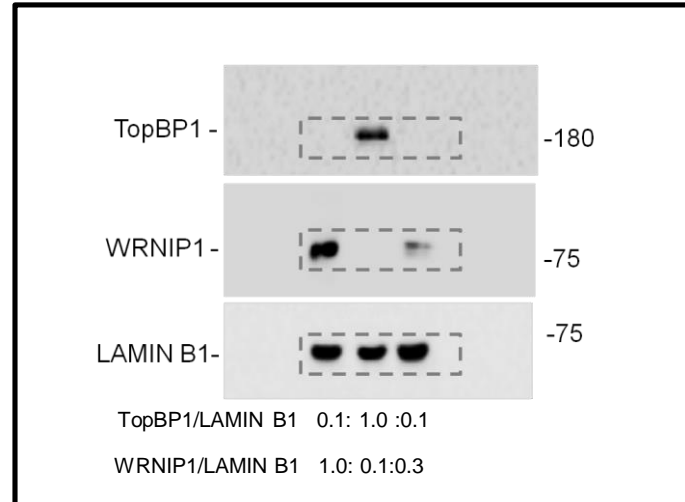

Figure 5

A

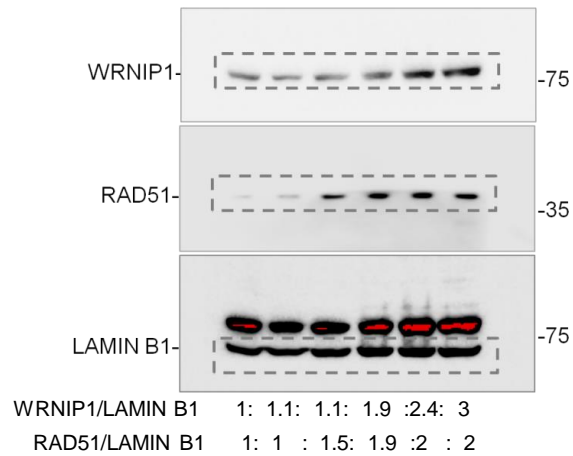

B

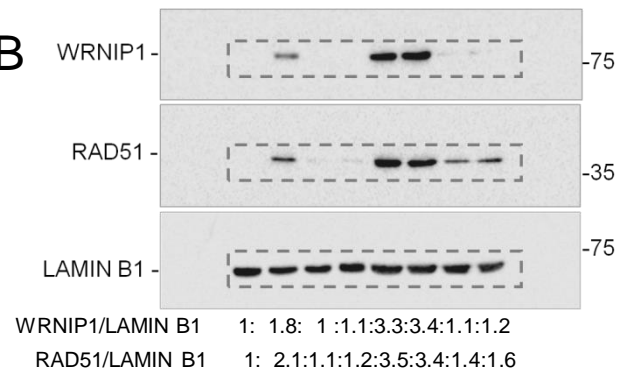

C

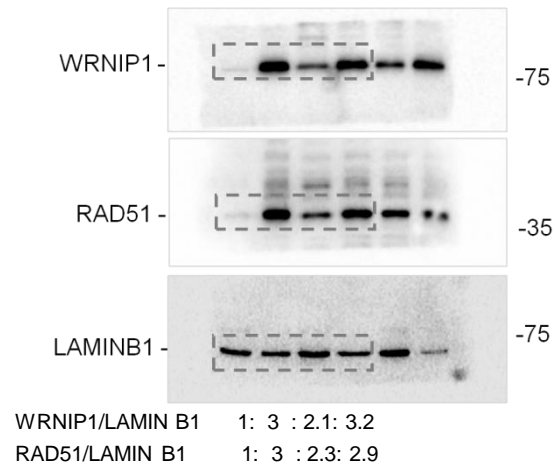

D

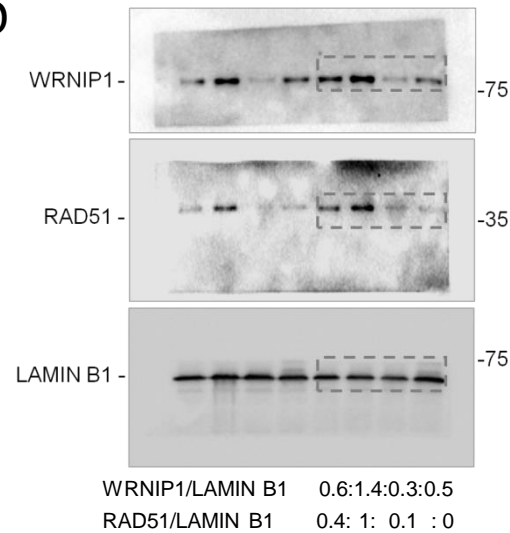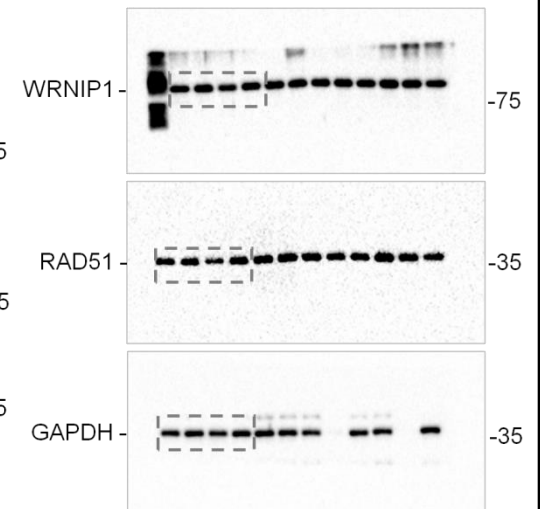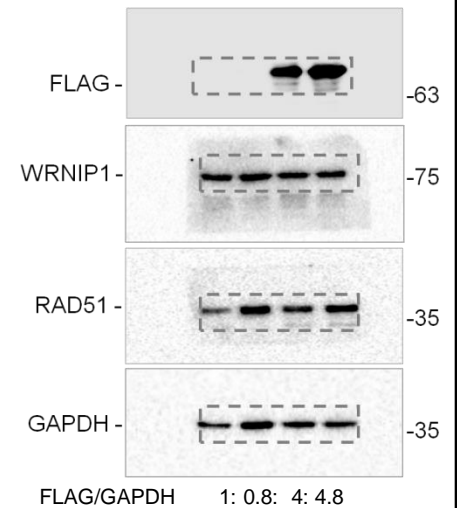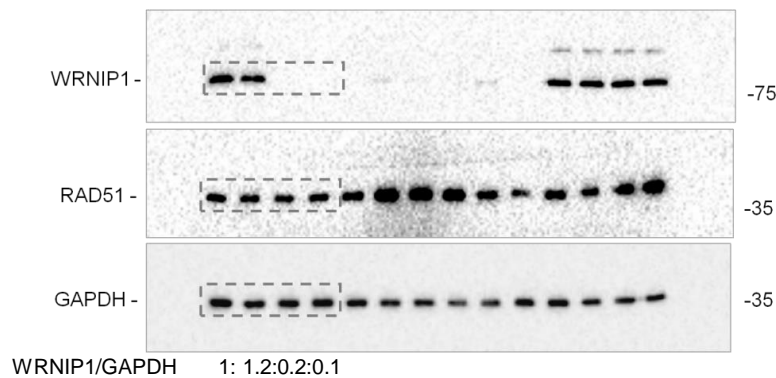

Supplementary Fig. 18

Figure 6

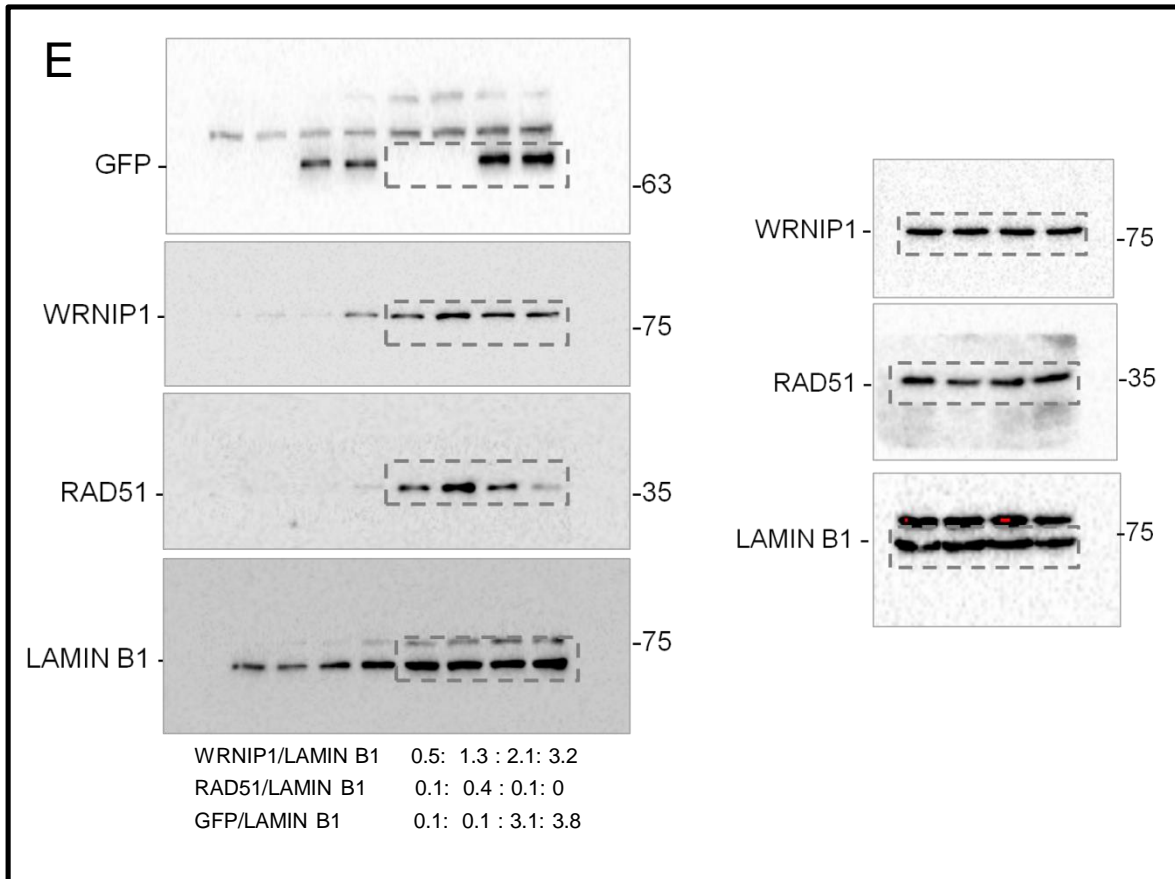

## Suppl. Figure 2

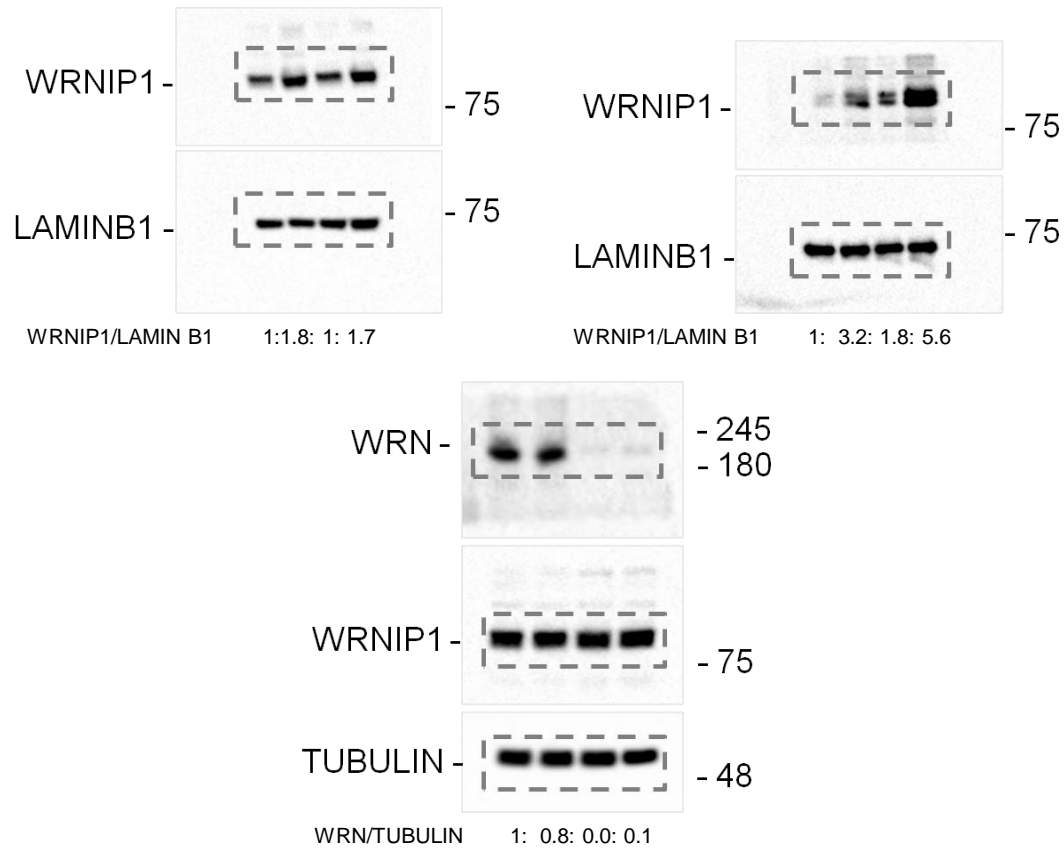

# Suppl. Figure 4

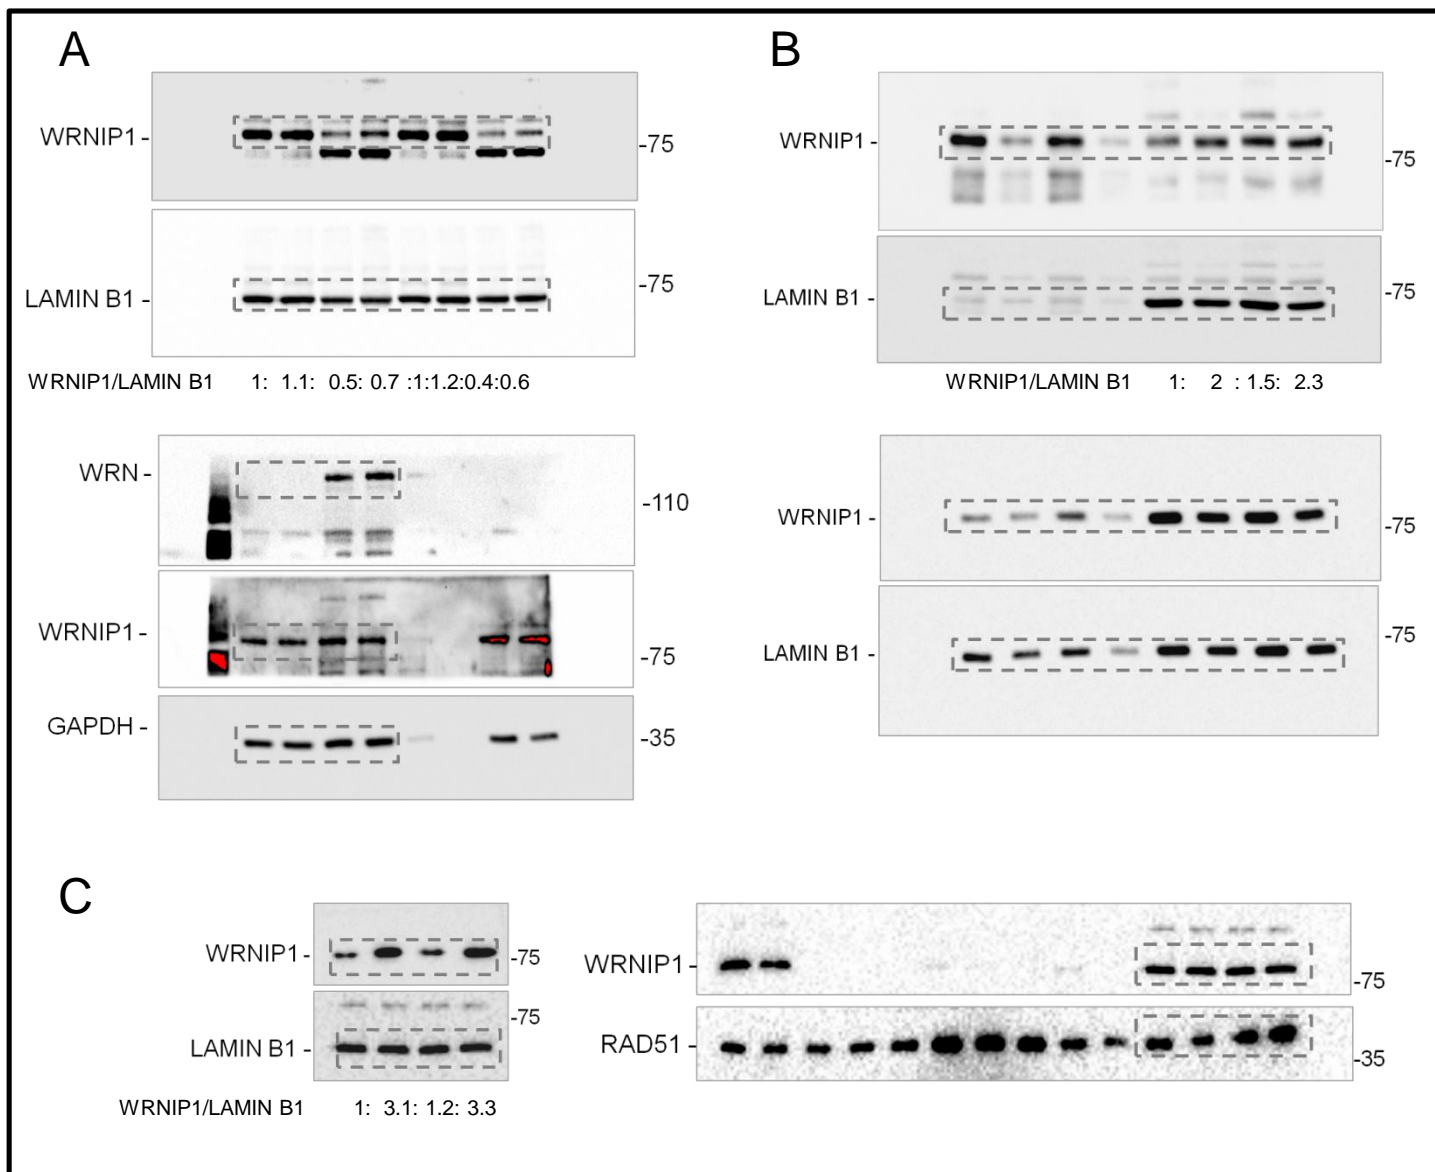

Suppl. Figure 6

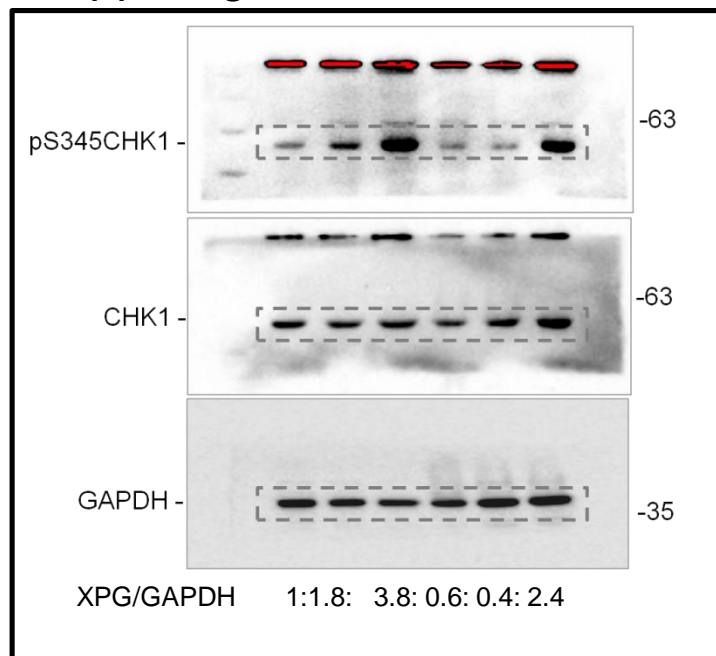

Suppl. Figure 10

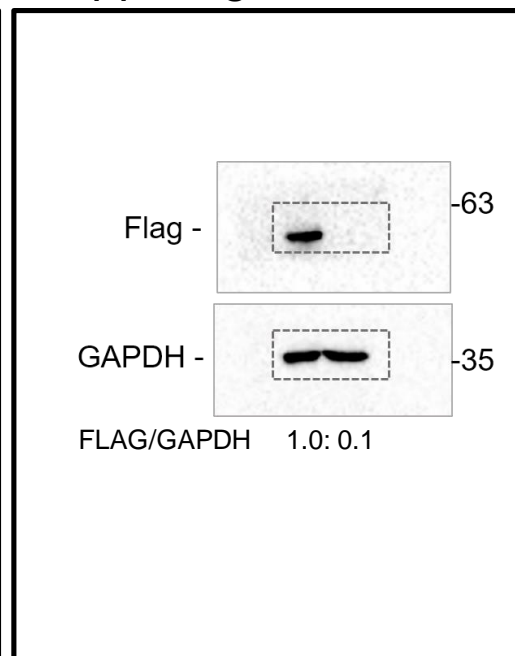

Suppl. Figure 12

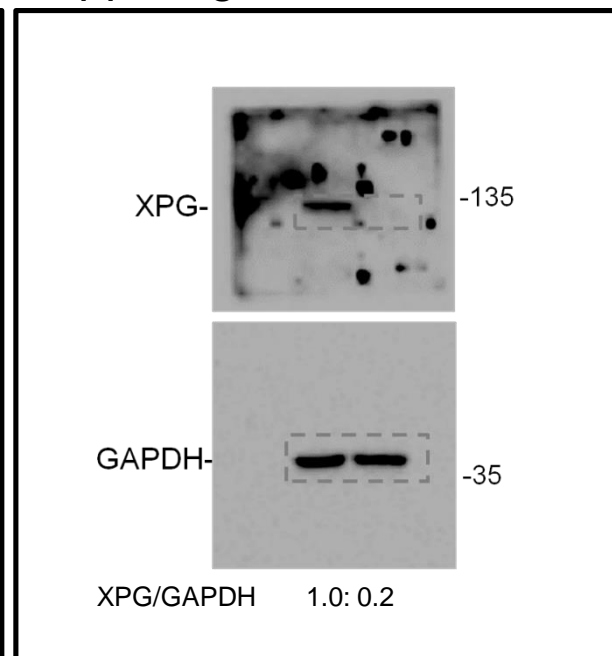

Supplement: s1 [file s1]
